# Supplementary material for: Signatures of selection and genomic diversity of Muskellunge (Esox masquinongy) from two populations in North America.
Source: Research Square preprint supplement (doi:10.21203/rs.3.rs-264701/v2), 2021-03-04
Supplement: Supplementary file 1 [file 5e3723df1c72e7986fdc2ce4.pdf]

**Signatures of selection and genomic diversity of Muskellunge (*Esox masquinongy*) from two populations in North America.**

Josue Chinchilla-Vargas<sup>1\*</sup>, Max F. Rothschild<sup>1</sup>, Francesca Bertolini<sup>2</sup>.  
<sup>1</sup> Iowa State University, Department of Animal Science, Ames, Iowa, 50011.  
<sup>2</sup> National Institute of Aquatic Resources, Technical University of Denmark, 2800, KGs. Lyngby, Denmark

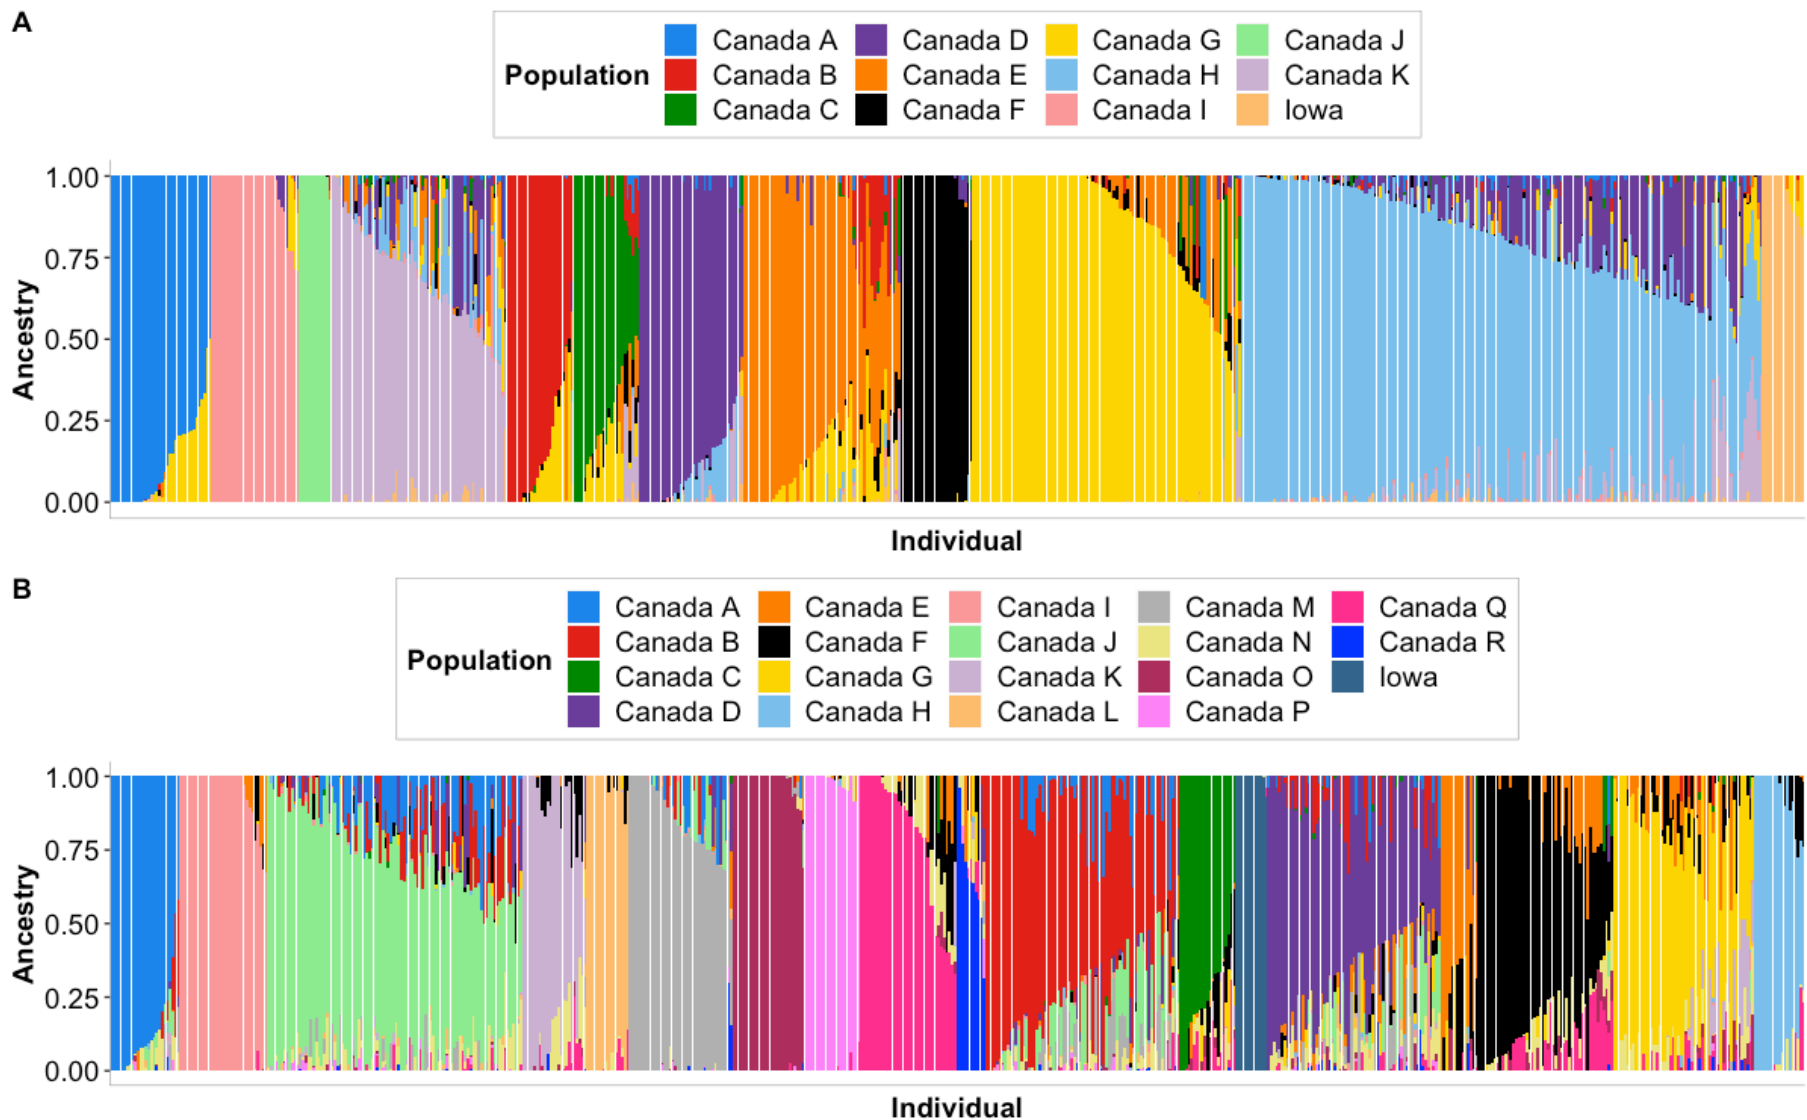

**Supplementary Figure 1. A.** Admixture analysis results for Muskellunge populations from Iowa and Canada with 12 assumed subpopulations. **B.** Admixture analysis result for Muskellunge populations from Iowa and Canada with 19 assumed subpopulations.
